# Supplementary material for: Pharmacological Evaluation of Newly Synthesized Cannabidiol Derivates on H9c2 Cells
Source: MDPI journal article supplement (doi:10.3390/antiox12091714), 2023-09-04

## Supporting Information

# Pharmacological Evaluation of Newly Synthesized Cannabidiol Derivates on H9c2 Cells

Kitti Szőke <sup>1,2</sup>, Richárd Kajtár <sup>1</sup>, Alexandra Gyöngyösi <sup>1</sup>, Attila Czompa <sup>1</sup>, Adina Fésüs <sup>1,2</sup>, Eszter Boglárka Lőrincz <sup>3,4</sup>, Ferenc Dániel Petróczi <sup>3,4</sup>, Pál Herczegh <sup>3</sup>, István Bak <sup>1</sup>, Anikó Borbás <sup>3</sup>, Ilona Bereczki <sup>3,5,6,\*</sup> and István Lekli <sup>1,\*</sup>

<sup>1</sup> Department of Pharmacology, Faculty of Pharmacy, University of Debrecen, 4032 Debrecen, Hungary; szoke.kitti@pharm.unideb.hu (K.S.); kajtar.ricsi@gmail.com (R.K.); gyongyosi.alexandra@pharm.unideb.hu (A.G.); czompa.attila@gmail.com (A.C.); fesus.adina@pharm.unideb.hu (A.F.); bak.istvan@pharm.unideb.hu (I.B.)

<sup>2</sup> Institute of Healthcare Industry, University of Debrecen, 4032 Debrecen, Hungary

<sup>3</sup> Department of Pharmaceutical Chemistry, Faculty of Pharmacy, University of Debrecen, 4032 Debrecen, Hungary; lorincz.eszter@pharm.unideb.hu (E.B.L.); petroczi.f.daniel@gmail.com (F.D.P.); herczegh.pal@pharm.unideb.hu (P.H.); borbas.aniko@science.unideb.hu (A.B.)

<sup>4</sup> Doctoral School of Pharmaceutical Sciences, University of Debrecen, 4032 Debrecen, Hungary

<sup>5</sup> National Laboratory of Virology, Szentágotthai Research Centre, 7624 Pécs, Hungary

<sup>6</sup> ELKH-DE Pharmamodul Research Team, University of Debrecen, 4032 Debrecen, Hungary

\* Correspondence: bereczki.ilona@pharm.unideb.hu (I.B.); lekli.istvan@pharm.unideb.hu (I.L.); Tel.: +36-52-255-586 (I.L.)

**Citation:** Szőke, K.; Kajtár, R.; Gyöngyösi, A.; Czompa, A.; Fésüs, A.; Lőrincz, E.B.; Petróczi, F.D.; Herczegh, P.; Bak, I.; Borbás, A.; et al. Pharmacological Evaluation of Newly Synthesized Cannabidiol Derivates on H9c2 Cells. *Antioxidants* **2023**, *12*, 1714. <https://doi.org/10.3390/antiox12091714>

Academic Editor: Sonia Trombino

Received: 1 August 2023

Revised: 25 August 2023

Accepted: 31 August 2023

Published: 4 September 2023

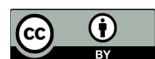

**Copyright:** © 2023 by the authors. Submitted for possible open access publication under the terms and conditions of the Creative Commons Attribution (CC BY) license (<https://creativecommons.org/licenses/by/4.0/>).

## Supporting Information

The NMR spectra for the newly synthesized compounds are given below.

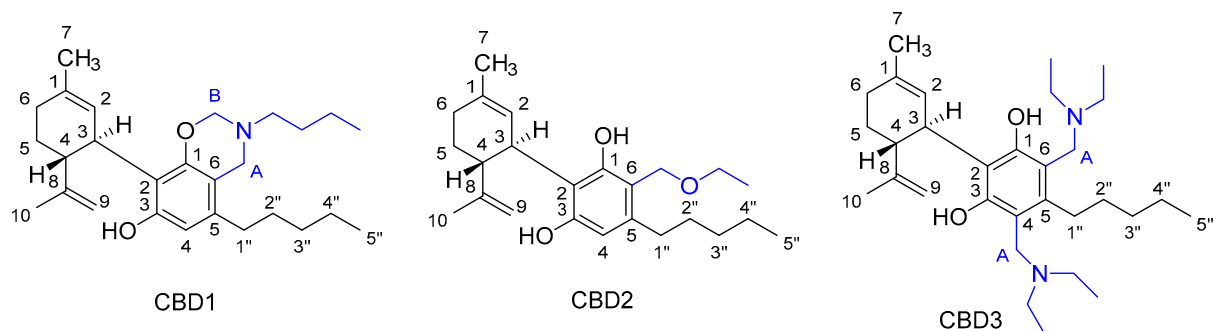

**Figure S1.** Numbering of the synthesized derivatives.

The NMR spectra for the newly synthesized compounds are given below.

NMR spectra of CBD1

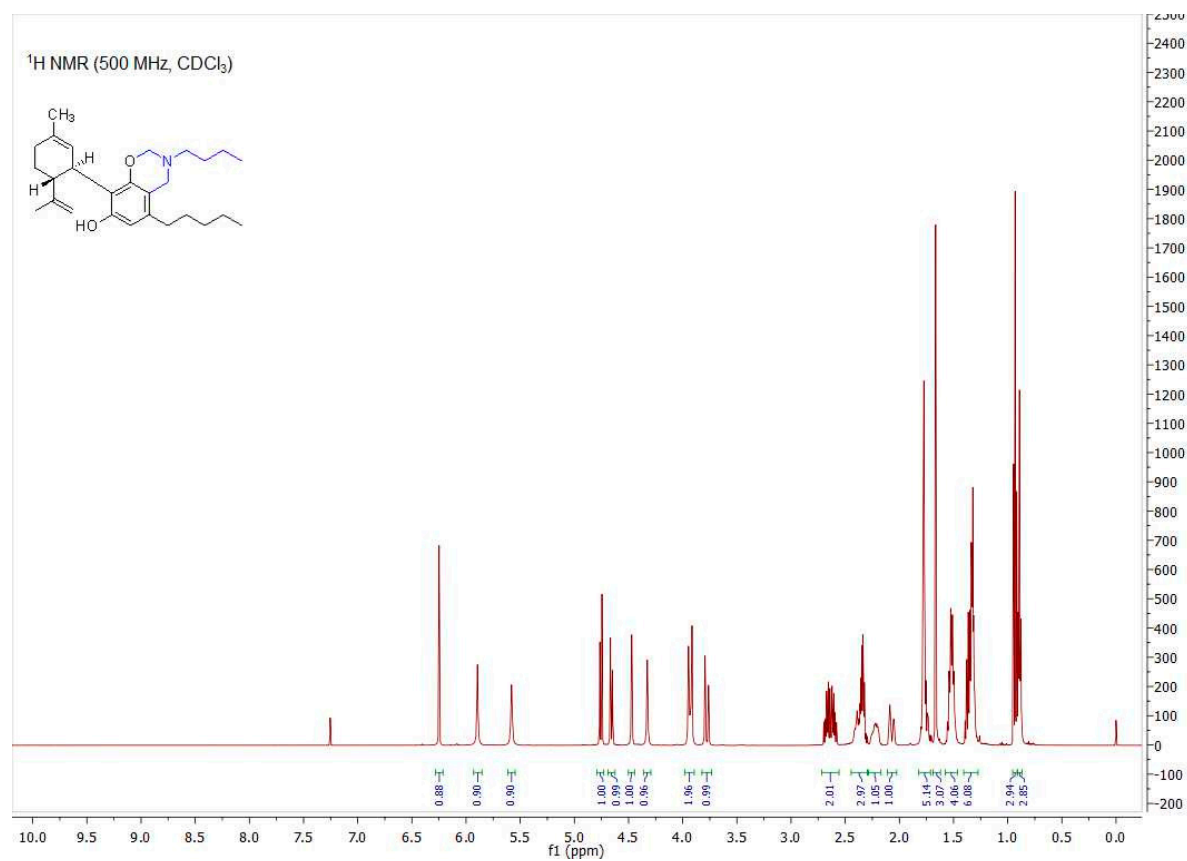

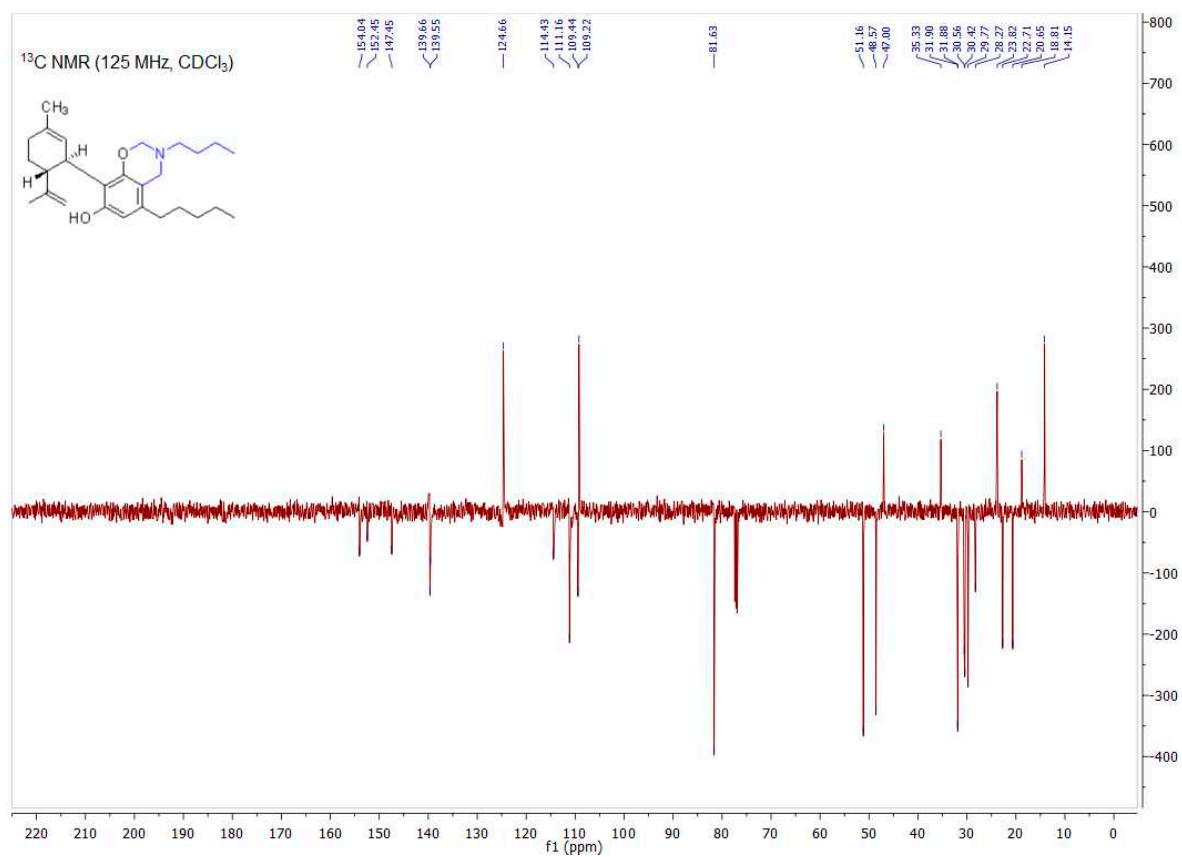

## NMR spectra of CBD2

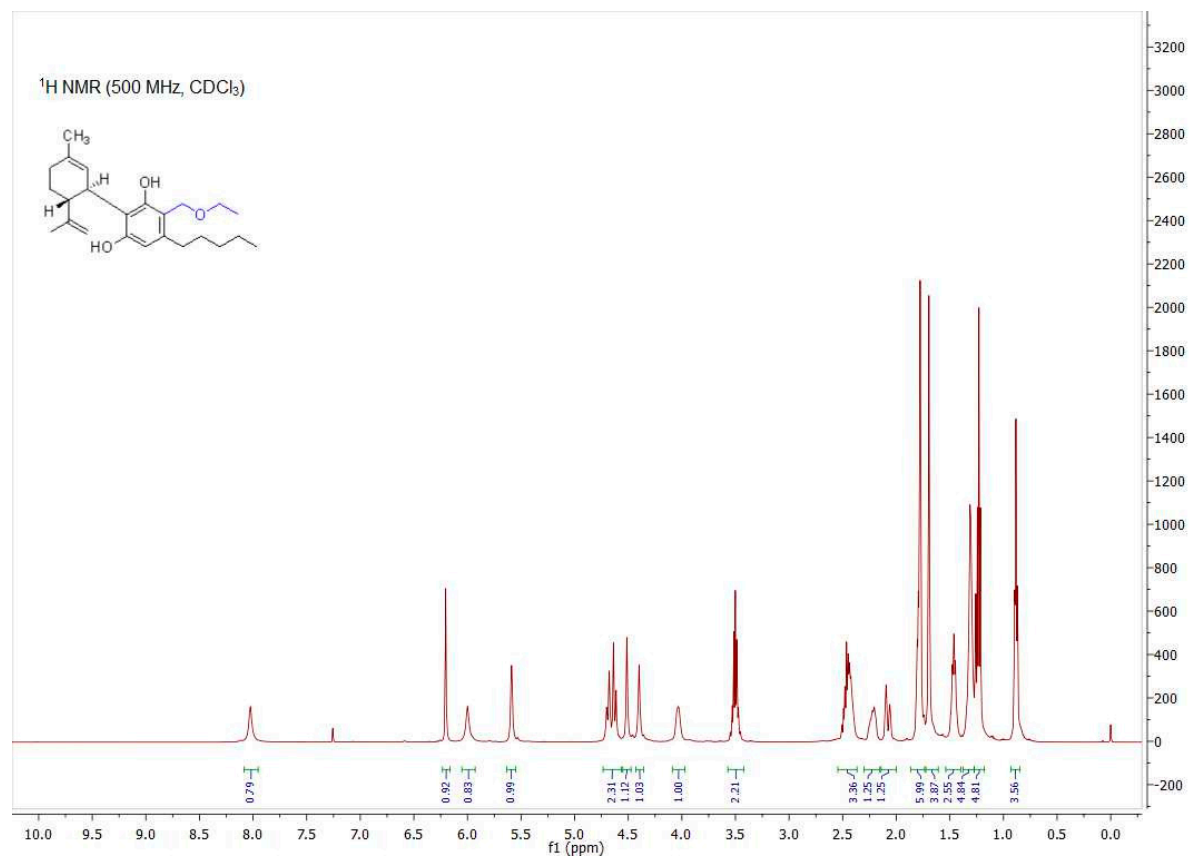

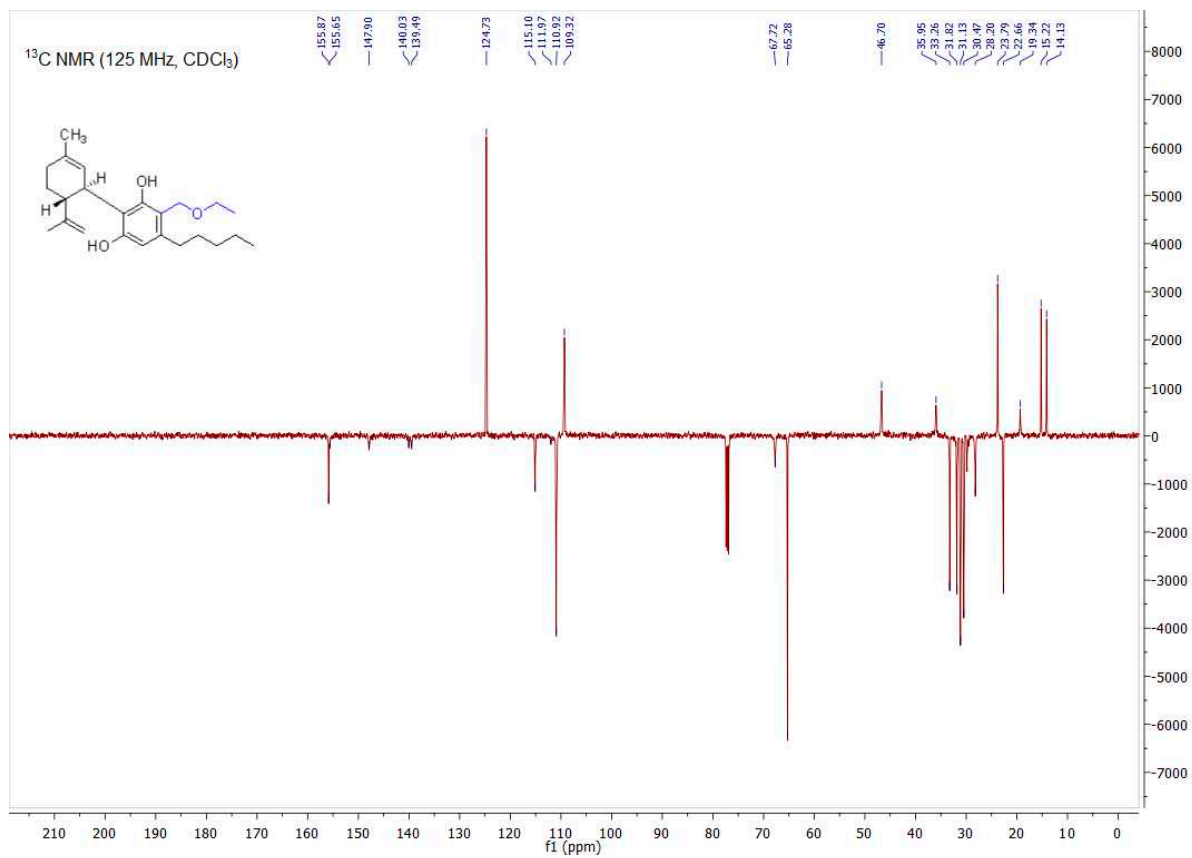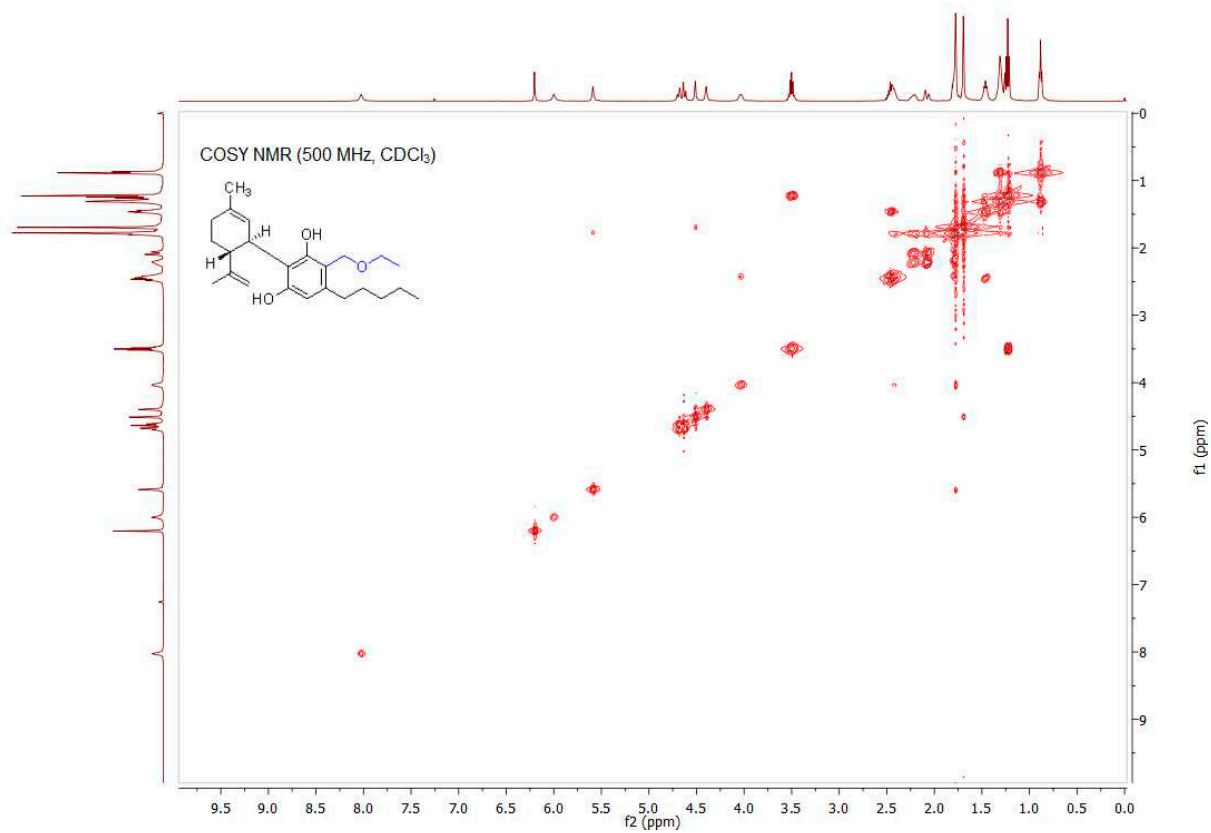

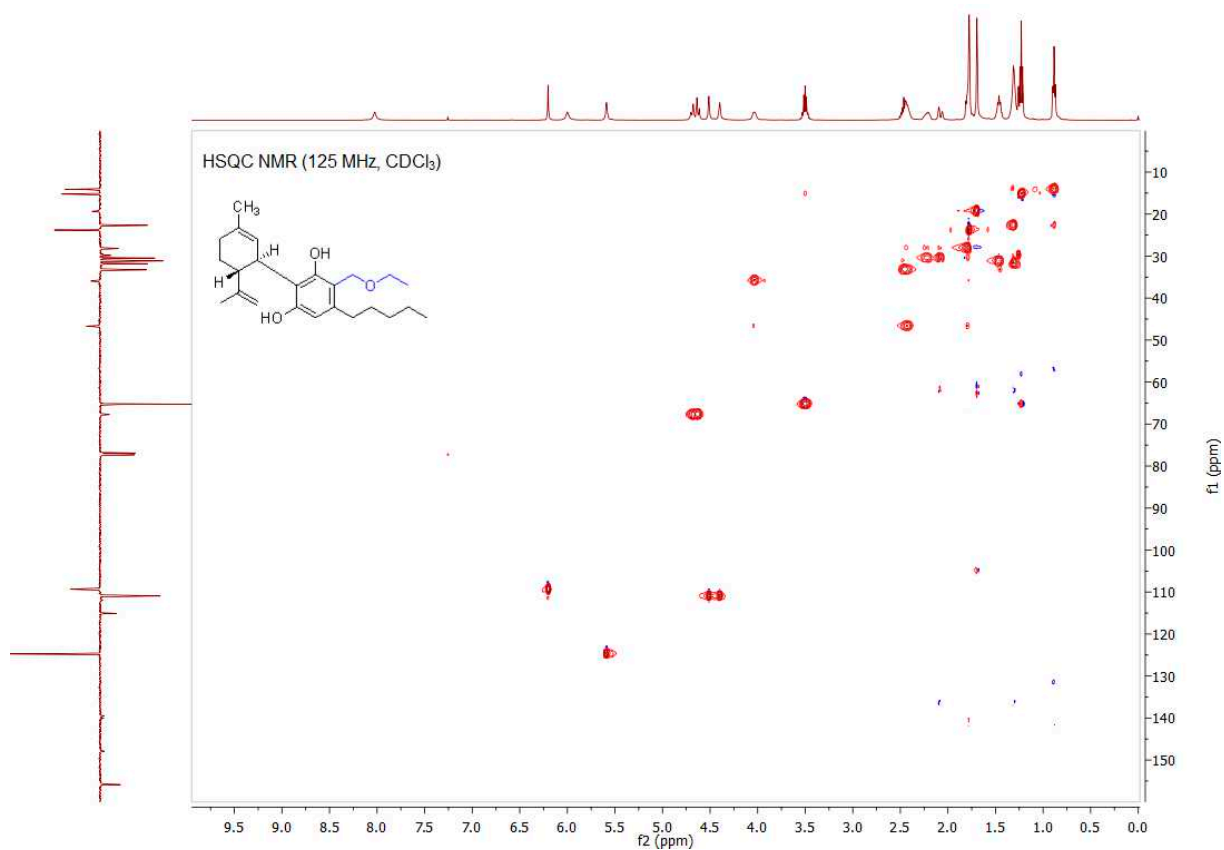

## NMR spectra of CBD3

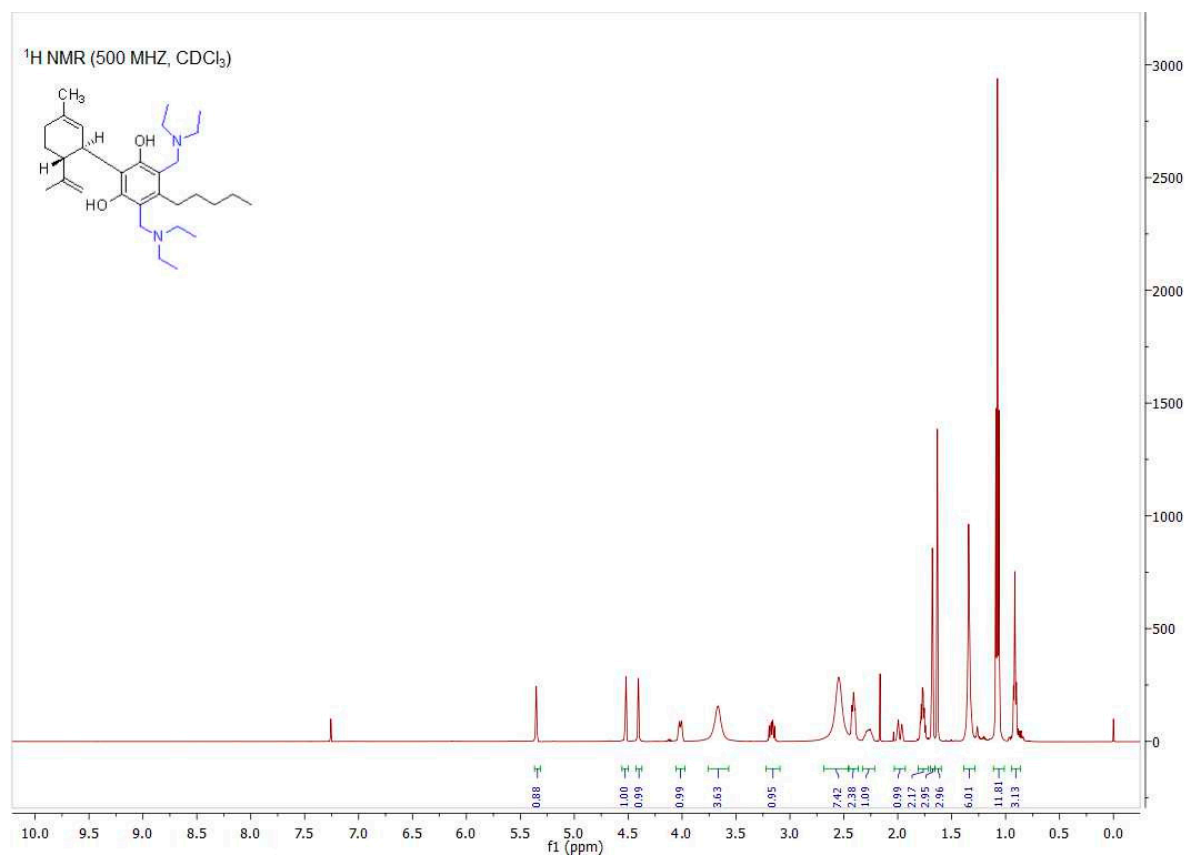

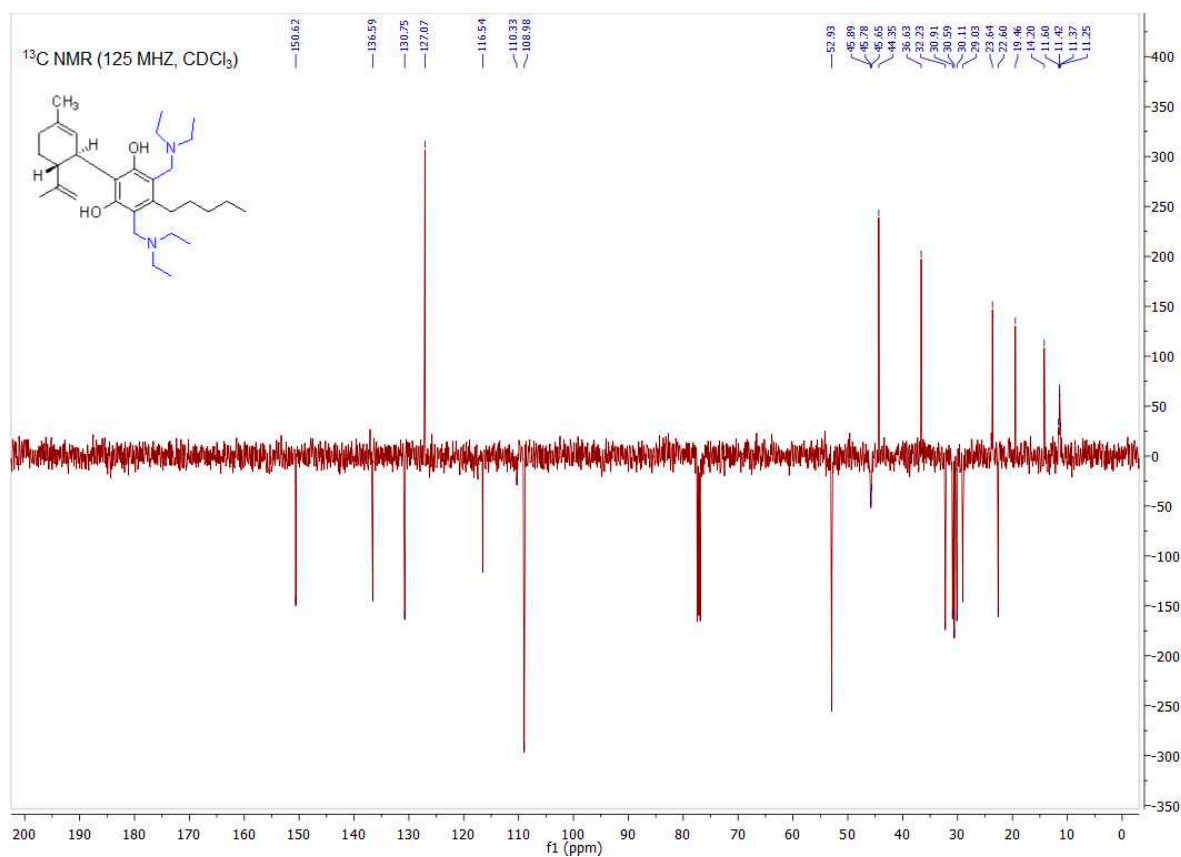

Supplement: s1 [file s1]
